# Supplementary material for: Cytopathic and Genomic Characteristics of a Human-Originated Pseudorabies Virus
Source: MDPI journal article supplement (doi:10.3390/v15010170), 2023-01-05
Supplement: s1 [file s1]

**Table S1.** PRV strains used for bioinformatical analyses in the present study

| Strain name  | GenBank accession | Country (province) |
|--------------|-------------------|--------------------|
| AnH1/CHN2015 | MK618718          | China (Anhui)      |
| BJ1/CHN2014  | MK642564          | China (Beijing)    |
| FJ1/CHN2016  | MK642565          | China (Fujian)     |
| GD1/CHN2016  | MK642566          | China (Guangdong)  |
| GD2/CHN2016  | MK642567          | China (Guangdong)  |
| GD3/CHN2016  | MK642568          | China (Guangdong)  |
| GD4/CHN2016  | MK642569          | China (Guangdong)  |
| GX1/CHN2014  | MK642585          | China (Guangxi)    |
| HeN1/CHN2012 | MK642583          | China (Henan)      |
| HeN1/CHN2014 | MK642584          | China (Henan)      |
| HeN2/CHN2014 | MK642582          | China (Henan)      |
| HeN3/CHN2014 | MK787153          | China (Henan)      |
| HeN4/CHN2014 | MK642581          | China (Henan)      |
| HeN1/CHN2015 | MK642580          | China (Henan)      |
| HeN2/CHN2015 | MK642579          | China (Henan)      |
| HeN3/CHN2015 | MK642578          | China (Henan)      |
| HeN1/CHN2016 | MK642577          | China (Henan)      |
| HeN2/CHN2016 | MK642576          | China (Henan)      |
| HeN3/CHN2016 | MK642575          | China (Henan)      |
| HuB1/CHN2015 | MK642574          | China (Hubei)      |
| HuB2/CHN2015 | MK642573          | China (Hubei)      |
| HuB3/CHN2015 | MK642572          | China (Hubei)      |
| HuB4/CHN2015 | MK642571          | China (Hubei)      |
| HuB5/CHN2015 | MK642570          | China (Hubei)      |
| HuB1/CHN2016 | MK682662          | China (Hubei)      |
| HuB2/CHN2016 | MK682663          | China (Hubei)      |
| HuB3/CHN2016 | MK682664          | China (Hubei)      |
| HuB4/CHN2016 | MK682665          | China (Hubei)      |
| HuB5/CHN2016 | MK682666          | China (Hubei)      |
| HuB6/CHN2016 | MK682667          | China (Hubei)      |
| HuB7/CHN2016 | MK682668          | China (Hubei)      |
| HuB8/CHN2016 | MK682669          | China (Hubei)      |
| HuB1/CHN2017 | MK682670          | China (Hubei)      |
| HuB2/CHN2017 | MK682671          | China (Hubei)      |
| HuN1/CHN2015 | MK682672          | China (Hunan)      |
| HuN1/CHN2016 | MK682673          | China (Hunan)      |
| JS1/CHN2015  | MK682674          | China (Jiangsu)    |
| JS2/CHN2015  | MK682675          | China (Jiangsu)    |
| JS1/CHN2017  | MK682676          | China (Jiangsu)    |
| JX1/CHN2014  | MK787152          | China (Jiangxi)    |
| JX1/CHN2015  | MK787151          | China (Jiangxi)    |
| JX2/CHN2015  | MK787150          | China (Jiangxi)    |

| Strain name  | GenBank accession | Country (province)     |
|--------------|-------------------|------------------------|
| NMG1/CHN2014 | MK787154          | China (Inner-Mongolia) |
| SD1/CHN2015  | MK787155          | China (Shandong)       |
| SD1/CHN2016  | MK787156          | China (Shandong)       |
| SD2/CHN2016  | MK787164          | China (Shandong)       |
| SHH1/CHN2015 | MK787156          | China (Shanghai)       |
| ZJ1/CHN2012  | MK787158          | China (Zhejiang)       |
| ZJ2/CHN2012  | MK787159          | China (Zhejiang)       |
| ZJ1/CHN2014  | MK787160          | China (Zhejiang)       |
| ZJ2/CHN2014  | MK787161          | China (Zhejiang)       |
| ZJ1/CHN2015  | MK787162          | China (Zhejiang)       |
| ZJ1/CHN2016  | MK787163          | China (Zhejiang)       |
| ZJ1/CHN2017  | MK787149          | China (Zhejiang)       |
| HN1201       | KP722022.1        | China                  |
| HNB          | KM189914.3        | China                  |
| HNX          | KM189912.1        | China                  |
| HeN1         | KP098534.1        | China                  |
| HLJ8         | KT824771.1        | China                  |
| JS-2012      | KP257591.1        | China                  |
| TJ           | KJ789182.1        | China                  |
| Fa           | KM189913.1        | China                  |
| Ea           | KX423960.1        | China                  |
| SC           | KT809429.1        | China                  |
| NIA3         | KU900059.1        | Northern Ireland       |
| Kaplan       | KJ717942.1        | United States          |
| Becker       | JF797219.1        | United States          |
| Bartha-K61   | JF797217.1        | Hungary                |
